# Supplementary material for: Promoter-distal RNA polymerase II binding discriminates active from inactive CCAAT/ enhancer-binding protein beta binding sites
Source: HighWire-hosted journal article supplement (doi:10.1101/gr.191593.115), 2015-10-20
Supplement: Supplemental_Table2.xlsx [file Supplemental_Table2.xlsx]

## Sheet: Sheet1
CEBPB site category	Cell	Total no. sites	No. active	% Active
HepG2 NO RNAP2	HepG2	410	60	14.6341
HepG2 RNAP2	HepG2	431	118	27.3782
K562 NO RNAP2	HepG2	269	11	4.08922
K562 RNAP2	HepG2	280	28	10
Shared NO RNAP2	HepG2	165	32	19.3939
Shared RNAP2	HepG2	175	60	34.2857
HepG2 NO RNAP2	K562	410	25	6.09756
HepG2 RNAP2	K562	431	44	10.2088
K562 NO RNAP2	K562	269	11	4.08922
K562 RNAP2	K562	280	50	17.8571
Shared NO RNAP2	K562	165	18	10.9091
Shared RNAP2	K562	175	46	26.2857
